# Supplementary material
Source: PubMed Central journal article supplement (PMC9814308)
Supplement: NIHMS1844923-supplement-Related_Manuscript_File_20.pdf [file NIHMS1844923-supplement-Related_Manuscript_File_20.pdf]

Suppl File 1 link to large data set published in Zenodo

<https://doi.org/10.5281/zenodo.7094023>
