# Supplementary material
Source: PubMed Central journal article supplement (PMC9814308)
Supplement: NIHMS1844923-supplement-Related_Manuscript_File_22.pdf [file NIHMS1844923-supplement-Related_Manuscript_File_22.pdf]

Suppl File 3 link to large data set in Xenodo

<https://doi.org/10.5281/zenodo.6968273>
